# Supplementary material
Source: publisher figshare collection journal article supplement (https://rs.figshare.com/ndownloader/files/17890673)

Supplementary Figure 2. Maximum likelihood topology from the concatenated, partitioned RAxML analysis of the 90% complete dataset of Coraciiformes and their outgroups using 15 ML searches for the best fit phylogenetic tree reconciled with 108 nonparametric bootstrap replicates as determined by the AutoMRE RAxML function. Dots represent bootstrap support: black circles indicate  $\geq 95\%$ , grey circles indicate  $\geq 75\text{--}94\%$ , and white indicate  $\leq 74\%$  bootstrap support.

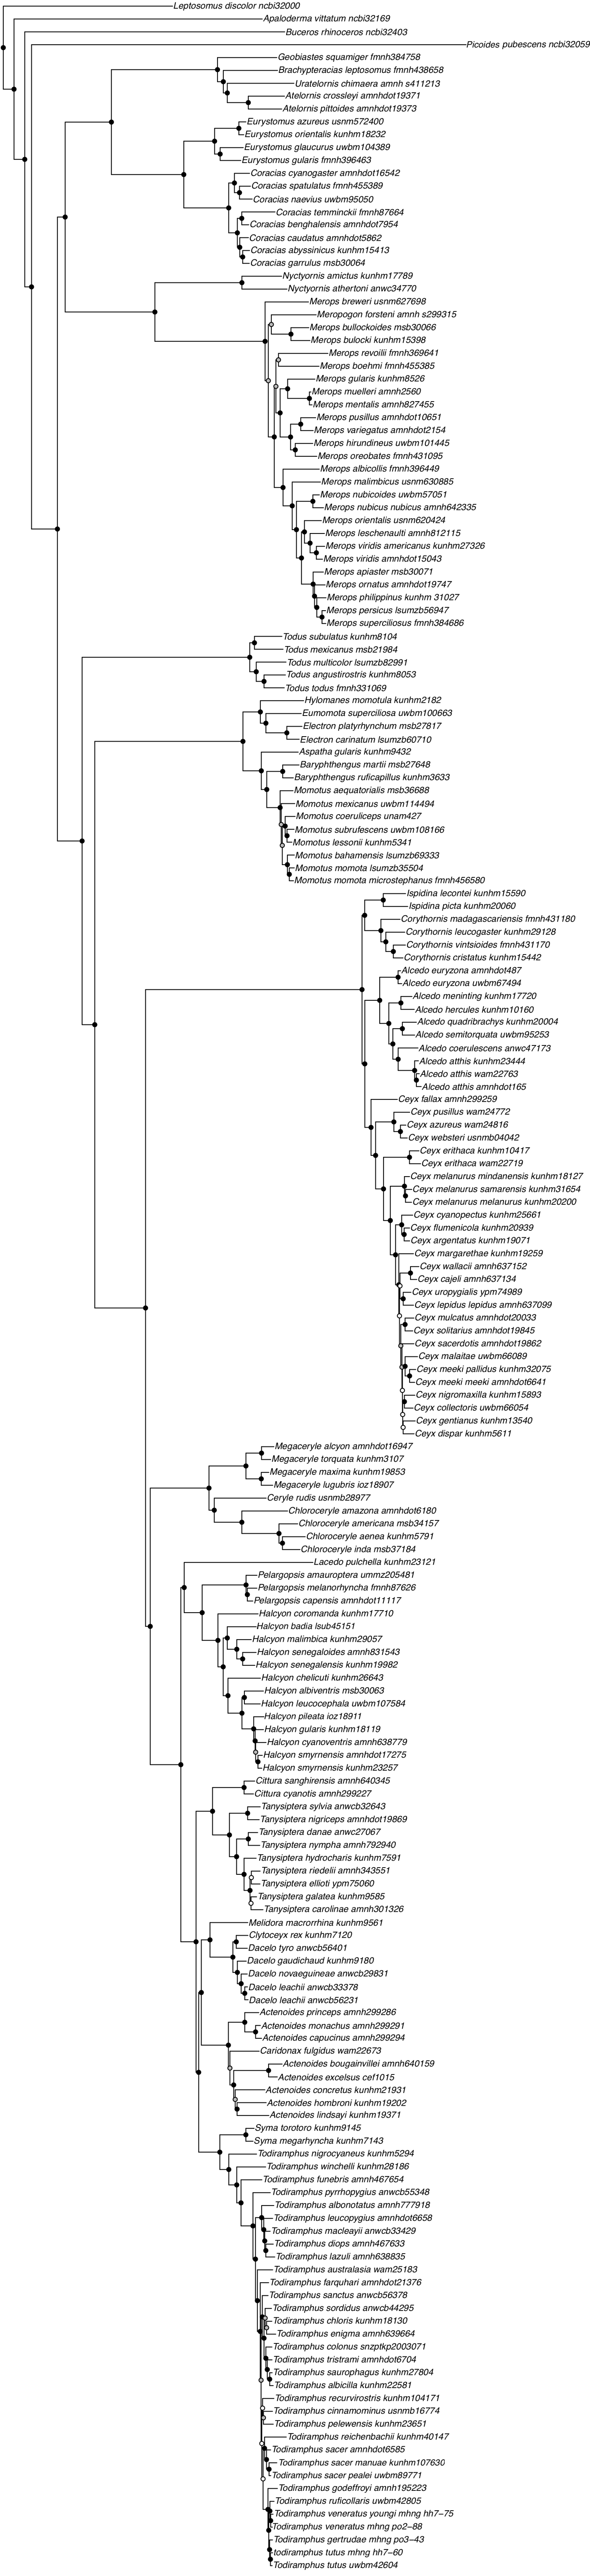

Supplement: Supplementary file 1 [file 17890673]
